# Supplementary material
Source: PubMed Central journal article supplement (PMC1334643)
Supplement: pnas_0506643103_4.pdf [file pnas_0506643103_4.pdf]

### Supporting Table 3

#### Linkage analysis of *T. gondii* infection phenotypes in F2 (LEW x BN) rats

| Locus     | cM <sup>§</sup> | anti-Tg by WB*        |                         | anti-Tg by IF <sup>†</sup> |                         | Brain cysts <sup>‡</sup> |                         |
|-----------|-----------------|-----------------------|-------------------------|----------------------------|-------------------------|--------------------------|-------------------------|
|           |                 | $\chi^2$ <sup>¶</sup> | p                       | $\chi^2$                   | p                       | $\chi^2$                 | p                       |
| D10Wox26  | 3.2             | 40.6                  | 1.6 x 10 <sup>-9</sup>  | 43.4                       | 8.4 x 10 <sup>-9</sup>  | 20.4                     | 3.8 x 10 <sup>-5</sup>  |
| D10Rat34  | 3.3             | 33.5                  | 2.7 x 10 <sup>-9</sup>  | 42.1                       | 1.6 x 10 <sup>-8</sup>  | 26.4                     | 1.9 x 10 <sup>-6</sup>  |
| D10Rat33  | 2.7             | 43.6                  | 3.4 x 10 <sup>-10</sup> | 47.3                       | 1.3 x 10 <sup>-9</sup>  | 18.5                     | 9.8 x 10 <sup>-5</sup>  |
| D10Rat167 | 2.4             | 45.6                  | 1.2 x 10 <sup>-10</sup> | 49.8                       | 4.0 x 10 <sup>-10</sup> | 25.1                     | 3.6 x 10 <sup>-6</sup>  |
| D10Mit3   | 1.5             | 47.9                  | 4.0 x 10 <sup>-11</sup> | 51.2                       | 2.0 x 10 <sup>-10</sup> | 31.5                     | 1.4 x 10 <sup>-7</sup>  |
| D10Rat164 | 0.9             | 61.3                  | 4.9 x 10 <sup>-14</sup> | 65.6                       | 1.9 x 10 <sup>-13</sup> | 32.6                     | 8.5 x 10 <sup>-8</sup>  |
| D10Mco17  | 0.6             | 61.4                  | 4.7 x 10 <sup>-14</sup> | 66.4                       | 1.3 x 10 <sup>-13</sup> | 32.6                     | 8.4 x 10 <sup>-8</sup>  |
| D10Arb4   | 4.6             | 64.0                  | 1.3 x 10 <sup>-14</sup> | 71.6                       | 1.0 x 10 <sup>-14</sup> | 33.8                     | 4.6 x 10 <sup>-8</sup>  |
| D10Rat32  | 3.0             | 79.6                  | 5.2 x 10 <sup>-18</sup> | 89.3                       | 1.9 x 10 <sup>-18</sup> | 47.5                     | 4.8 x 10 <sup>-11</sup> |
| D10Rat116 | 1.7             | 80.6                  | 3.1 x 10 <sup>-18</sup> | 90.1                       | 1.3 x 10 <sup>-18</sup> | 43.4                     | 3.8 x 10 <sup>-10</sup> |
| D10Rat80  | 2.7             | 76.2                  | 2.9 x 10 <sup>-17</sup> | 84.9                       | 1.6 x 10 <sup>-17</sup> | 42.5                     | 5.9 x 10 <sup>-10</sup> |
| D10Wox24  | 3.4             | 59.0                  | 1.5 x 10 <sup>-13</sup> | 62.0                       | 1.1 x 10 <sup>-12</sup> | 34.1                     | 3.9 x 10 <sup>-8</sup>  |
| D10Rat58  | 1.8             | 51.6                  | 6.1 x 10 <sup>-12</sup> | 54.3                       | 4.5 x 10 <sup>-11</sup> | 29.2                     | 4.5 x 10 <sup>-7</sup>  |
| D10Rat27  |                 | 49.0                  | 2.2 x 10 <sup>-11</sup> | 51.6                       | 1.7 x 10 <sup>-10</sup> | 25.2                     | 3.4 x 10 <sup>-6</sup>  |

\* : Detection of anti-*T. gondii* (Tg) Ab by western blot (WB)

† : Semi quantitative evaluation of anti-*T. gondii* Ab titers by immunofluorescence (IF)

‡ : Counting of brain cysts

§ : Distance in cM between two adjacent markers

¶ : Pearson's  $\chi^2$  statistics with 2 (anti-TG by WB and brain cysts) or 4 (anti-TG by IF) degrees of freedom
