# Supplementary material
Source: PubMed Central journal article supplement (PMC1334643)
Supplement: pnas_0506643103_5.pdf [file pnas_0506643103_5.pdf]

### Supporting Table 4

#### List of identified and putative genes within the *Toxo1* interval\*

| Sequence accession | Gene Symbol | UniGene description                                                      | Human <sup>†§</sup> | Mouse <sup>‡§</sup> |
|--------------------|-------------|--------------------------------------------------------------------------|---------------------|---------------------|
| NM_053484          | Gas7        | Growth arrest specific 7                                                 | GAS7                | Gas7                |
| NM_080901          | Rcvrn       | Recoverin                                                                | RCV1                | Rcvrn               |
| NM_021848          | Glp2r       | Glucagon-like peptide 2 receptor                                         | GLP2R               | Glp2r               |
| NM_031656          | Stx8        | Syntaxin 8                                                               | STX8                | Stx8                |
| NM_053731          | Ntn1        | Netrin 1                                                                 | NTN1                | Ntn1                |
| NM_031520          | Myh10       | Myosin heavy chain 10, non-muscle                                        | MYH10               | Myh10               |
| NM_133320          | Ndel1       | NudE nuclear distribution gene E homolog like 1(A. nidulans)             | NDEL1               | /                   |
| NM_001007670       | Odf4        | OPPO 1                                                                   | ODF4                | Odf4                |
| NM_053749          | Aurkb       | Aurora kinase B                                                          | AURKB               | Aurkb               |
| NM_012663          | Vamp2       | Vesicle-associated membrane protein 2                                    | VAMP2               | Vamp2               |
| AB092976           | Per1        | Period homolog 1 (Drosophila)                                            | PER1                | Per1                |
| NM_153301          | Alox15b     | Arachidonate 15-lipoxygenase, second type                                | ALOX15B             | Alox15b             |
| NM_024380          | Gucy2e      | Guanylyl cyclase (GC-E)                                                  | GUCY2D              | Gucy2e              |
| NM_031652          | Kcnab3      | Potassium voltage gated channel, shaker related subfamily, beta member 3 | KCNAB3              | Kcnab3              |
| D26493             | DLP2        | Dynein-like protein 2                                                    | /                   | /                   |
| NM_001007610       | MGC94565    | Similar to hypothetical protein MGC28622                                 | /                   | /                   |
| NM_030989          | Tp53        | Tumor protein p53                                                        | TP53                | Trp53               |
| NM_012507          | Atp1b2      | ATPase, Na <sup>+</sup> /K <sup>+</sup> transporting, beta 2 polypeptide | ATP1B2              | Atp1b2              |
| NM_012650          | Shbg        | Sex hormone binding globulin                                             | SHBG                | Shbg                |

|              |          |                                                                                             |         |         |
|--------------|----------|---------------------------------------------------------------------------------------------|---------|---------|
| NM_199372    | Eif4a1   | Similar to eukaryotic translation initiation factor 4A1; initiation factor eIF-4A long form | /       | /       |
| NM_001009623 | Tnfsf13  | Tumor necrosis factor ligand superfamily member 13 predicted                                | TNFSF13 | /       |
| NM_001001513 | Tnfsf12  | Tumor necrosis factor ligand superfamily member 12                                          | /       | /       |
| NM_012528    | Chrnbl   | Cholinergic receptor, nicotinic, beta polypeptide 1 (muscle)                                | CHRNB1  | Chrnbl  |
| NM_130816    | Fgf11    | Fibroblast growth factor 11                                                                 | FGF11   | Fgf11   |
| NM_053992    | Nlgn2    | Neurologin 2                                                                                | NLGN2   | /       |
| NM_012751    | Slc2a4   | Solute carrier family 2 (facilitated glucose transporter), member 4                         | SLC2A4  | Slc2a4  |
| AJ011811     | Cldn7    | Claudin 7                                                                                   | CLDN7   | Cldn7   |
| NM_001001718 | DERP6    | Dermal papilla derived protein 6                                                            | /       | /       |
| NM_172036    | Gabarap  | Gamma-aminobutyric acid receptor associated protein                                         | GABARAP | Gabarap |
| NM_001004272 | MGC94192 | Similar to PHD zinc finger containing protein JUNE1                                         | /       | /       |
| NM_012891    | Acadvl   | Acyl-Coenzyme A dehydrogenase, very long chain                                              | ACADVL  | Acadvl  |
| NM_019621    | Dlgh4    | Discs, large homolog 4 (Drosophila)                                                         | DLG4    | Dlgh4   |
| NM_012503    | Asgr1    | Asialoglycoprotein receptor 1                                                               | ASGR1   | Asgr1   |
| NM_017189    | Asgr2    | Asialoglycoprotein receptor 2                                                               | ASGR2   | Asgr2   |
| NM_022393    | Mgl1     | Macrophage galactose N-acetyl-galactosamine specific lectin 1                               | /       | Mgl1    |
| NM_001005530 | MGC93826 | Similar to RIKEN cDNA 1700007D07                                                            | /       | /       |
| NM_031010    | Alox15   | Arachidonate 12-lipoxygenase                                                                | ALOX15  | Alox15  |
| NM_012911    | Arrb2    | Arrestin, beta 2                                                                            | ARRB2   | Arrb2   |
| NM_057099    | Psmb6    | Proteasome (prosome, macropain) subunit, beta type 6                                        | PSMB6   | Psmb6   |

|              |          |                                                                    |          |          |
|--------------|----------|--------------------------------------------------------------------|----------|----------|
| NM_033299    | Pld2     | Phospholipase D2                                                   | PLD2     | Pld2     |
| NM_017194    | Chrne    | Cholinergic receptor, nicotinic, epsilon polypeptide               | CHRNE    | Chrne    |
| NM_022398    | LOC64201 | 2-oxoglutarate carrier                                             | SLC25A11 | Slc25a11 |
| NM_022511    | Pfn1     | Profilin 1                                                         | PFN1     | Pfn1     |
| NM_012949    | Eno3     | Enolase 3, beta                                                    | /        | Eno3     |
| NM_145877    | Kif1c    | Kinesin family member 1C                                           | /        | /        |
| NM_019124    | Rabep1   | Rabaptin 5                                                         | /        | /        |
| NM_053616    | Prei2    | Preimplantation protein 2                                          | NUP88    | Nup88    |
| NM_019259    | C1qbp    | Complement component 1, q subcomponent binding protein             | NUP88    | Nup88    |
| NM_021590    | Aipl1    | Aryl hydrocarbon receptor-interacting protein-like 1               | AIPL1    | Aipl1    |
| NM_170668    | Nact     | Sodium-coupled citrate transporter                                 | /        | /        |
| NM_053508    | Tekt1    | Tektin 1                                                           | TEKT1    | Tekt1    |
| NM_001002820 | Ggt6     | Gamma-glutamyl transferase 6                                       | /        | /        |
| NM_031668    | Mybbp1a  | MYB binding protein (P160) 1a                                      | MYBBP1A  | Mybbp1a  |
| NM_022690    | Ube2g1   | Ubiquitin-conjugating enzyme E2G 1 (UBC7 homolog, C. elegans)      | UBE2G1   | /        |
| NM_001007671 | MGC94212 | Similar to hypothetical protein MGC32124                           | /        | /        |
| NM_012914    | Atp2a3   | ATPase, Ca <sup>++</sup> transporting, ubiquitous                  | ATP2A3   | Atp2a3   |
| NM_012997    | P2rx1    | Purinergic receptor P2X, ligand-gated ion channel, 1               | P2RX1    | P2rx1    |
| NM_031662    | Camkk1   | Calcium/calmodulin-dependent protein kinase kinase 1, alpha        | CAMKK1   | Camkk1   |
| NM_080780    | P2rx5    | Purinergic receptor P2X, ligand-gated ion channel, 5               | P2RX5    | P2rx5    |
| NM_031982    | Trpv1    | Transient receptor potential cation channel, subfamily V, member 1 | TRPV1    | Trpv1    |

|              |         |                                 |      |      |
|--------------|---------|---------------------------------|------|------|
| NM_024399    | Aspa    | Aspartoacylase                  | ASPA | Aspa |
| NM_001000024 | Olr1466 | Olfactory receptor gene Olr1466 | /    | /    |
| NM_001000025 | Olr1467 | Olfactory receptor gene Olr1467 | /    | /    |
| NM_001000724 | Olr1468 | Olfactory receptor gene Olr1468 | /    | /    |
| NM_212527    | Olr1469 | Olfactory receptor gene Olr1469 | /    | /    |
| NM_001000723 | Olr1470 | Olfactory receptor gene Olr1470 | /    | /    |
| NM_001000722 | Olr1471 | Olfactory receptor gene Olr1471 | /    | /    |
| NM_001000944 | Olr1472 | Olfactory receptor gene Olr1472 | /    | /    |
| NM_001000943 | Olr1474 | Olfactory receptor gene Olr1474 | /    | /    |
| NM_001000027 | Olr1475 | Olfactory receptor gene Olr1475 | /    | /    |
| NM_001000721 | Olr1479 | Olfactory receptor gene Olr1479 | /    | /    |
| NM_001000527 | Olr1481 | Olfactory receptor gene Olr1481 | /    | /    |
| NM_001000026 | Olr1482 | Olfactory receptor gene Olr1482 | /    | /    |
| NM_001000028 | Olr1485 | Olfactory receptor gene Olr1485 | /    | /    |
| NM_001000720 | Olr1486 | Olfactory receptor gene Olr1486 | /    | /    |
| NM_001000719 | Olr1488 | Olfactory receptor gene Olr1488 | /    | /    |
| NM_001000718 | Olr1490 | Olfactory receptor gene Olr1490 | /    | /    |
| NM_001000717 | Olr1491 | Olfactory receptor gene Olr1491 | /    | /    |
| NM_001000029 | Olr1492 | Olfactory receptor gene Olr1492 | /    | /    |
| NM_001000716 | Olr1496 | Olfactory receptor gene Olr1496 | /    | /    |
| NM_001000030 | Olr1498 | Olfactory receptor gene Olr1498 | /    | /    |
| NM_001000031 | Olr1499 | Olfactory receptor gene Olr1499 | /    | /    |
| NM_001000942 | Olr1500 | Olfactory receptor gene Olr1500 | /    | /    |
| NM_001000715 | Olr1501 | Olfactory receptor gene Olr1501 | /    | /    |
| NM_001000495 | Olr1504 | Olfactory receptor gene Olr1504 | /    | /    |
| NM_001000032 | Olr1505 | Olfactory receptor gene Olr1505 | /    | /    |

\* : this list was established using the "genome annotation tool" of the Rat Genome Database : <http://rgd.mcw.edu/sequenceresources/genome-annotation.shtml>. (Twigger, S. N., Pasko, D., Nie, J., Shimoyama, M., Bromberg, S., Campbell, D., Chen, J., dela Cruz, N., Fan, C., Foote, C., Harris, G., Hickmann, B., Ji, Y., Jin, W., Li, D., Mathis, J., Nenasheva, N., Nigam, R., Petri, V., Reilly, D., Ruotti, V., Schauburger, E., Seiler, K., Slyper, R., Smith, J., Wang, W., Wu, W., Zhao, L., Zuniga-Meyer, A., Tonellato, P. J., Kwitek, A. E. & Jacob, H. J. (2005) *Physiol Genomics* **23**, 246-56.). A

† : Human orthologous gene found in the syntenic region of the human genome, in p13.2-13.1 on chromosome 17

‡ : mouse orthologous gene found in the syntenic region of the mouse genome, in B3-B4 on chromosome 11

§ : A three-way comparative map (human-rat-mouse) is shown in the supporting figure 3.

Details are available upon request to [Thomas.Faraut@toulouse.inra.fr](mailto:Thomas.Faraut@toulouse.inra.fr)
