# Supplementary material
Source: PubMed Central journal article supplement (PMC1334643)

## LEW.BNc10

## BN.LEWc10

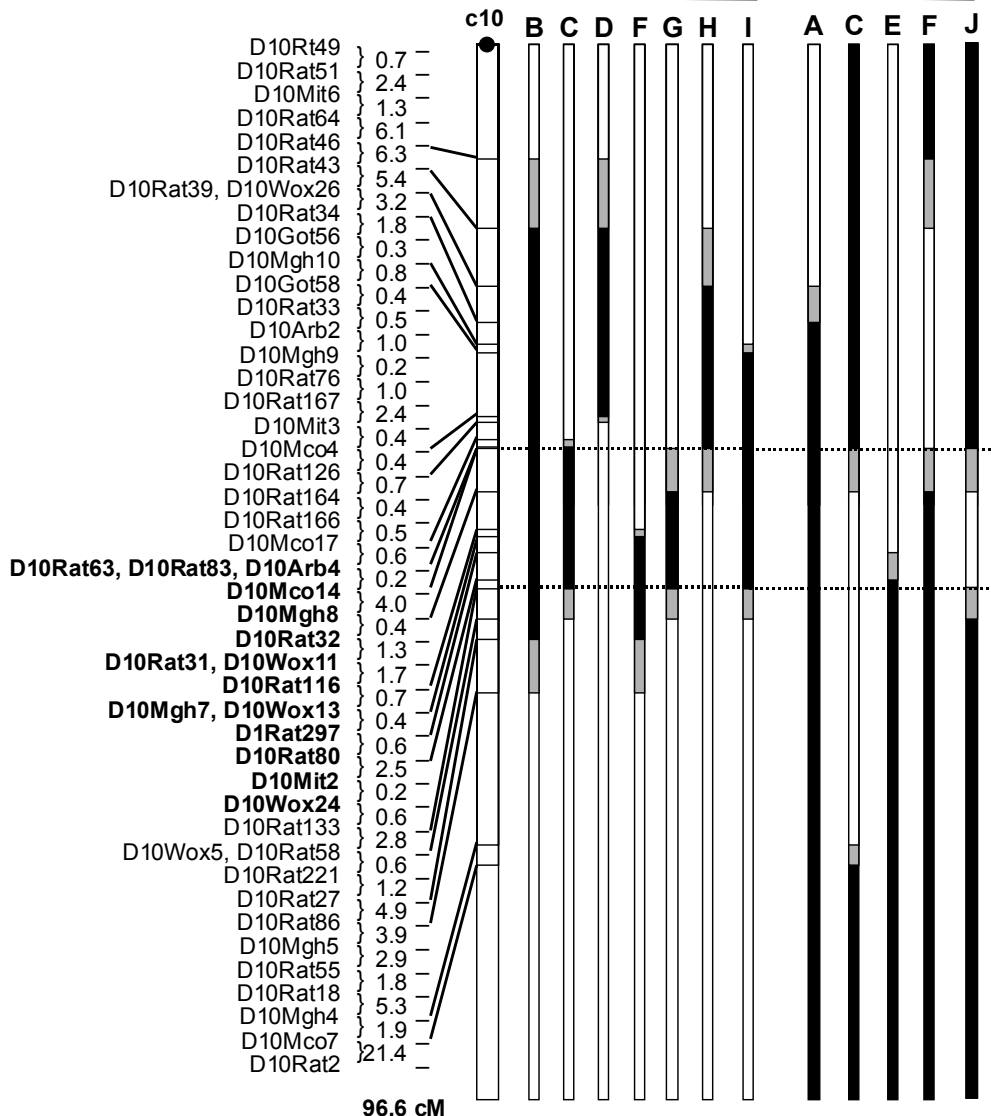

Supplement: pnas_0506643103_1.pdf [file pnas_0506643103_1.pdf]

Mm 11B3-B4

Rn 10q24

Hs 17p13.2-p13.1

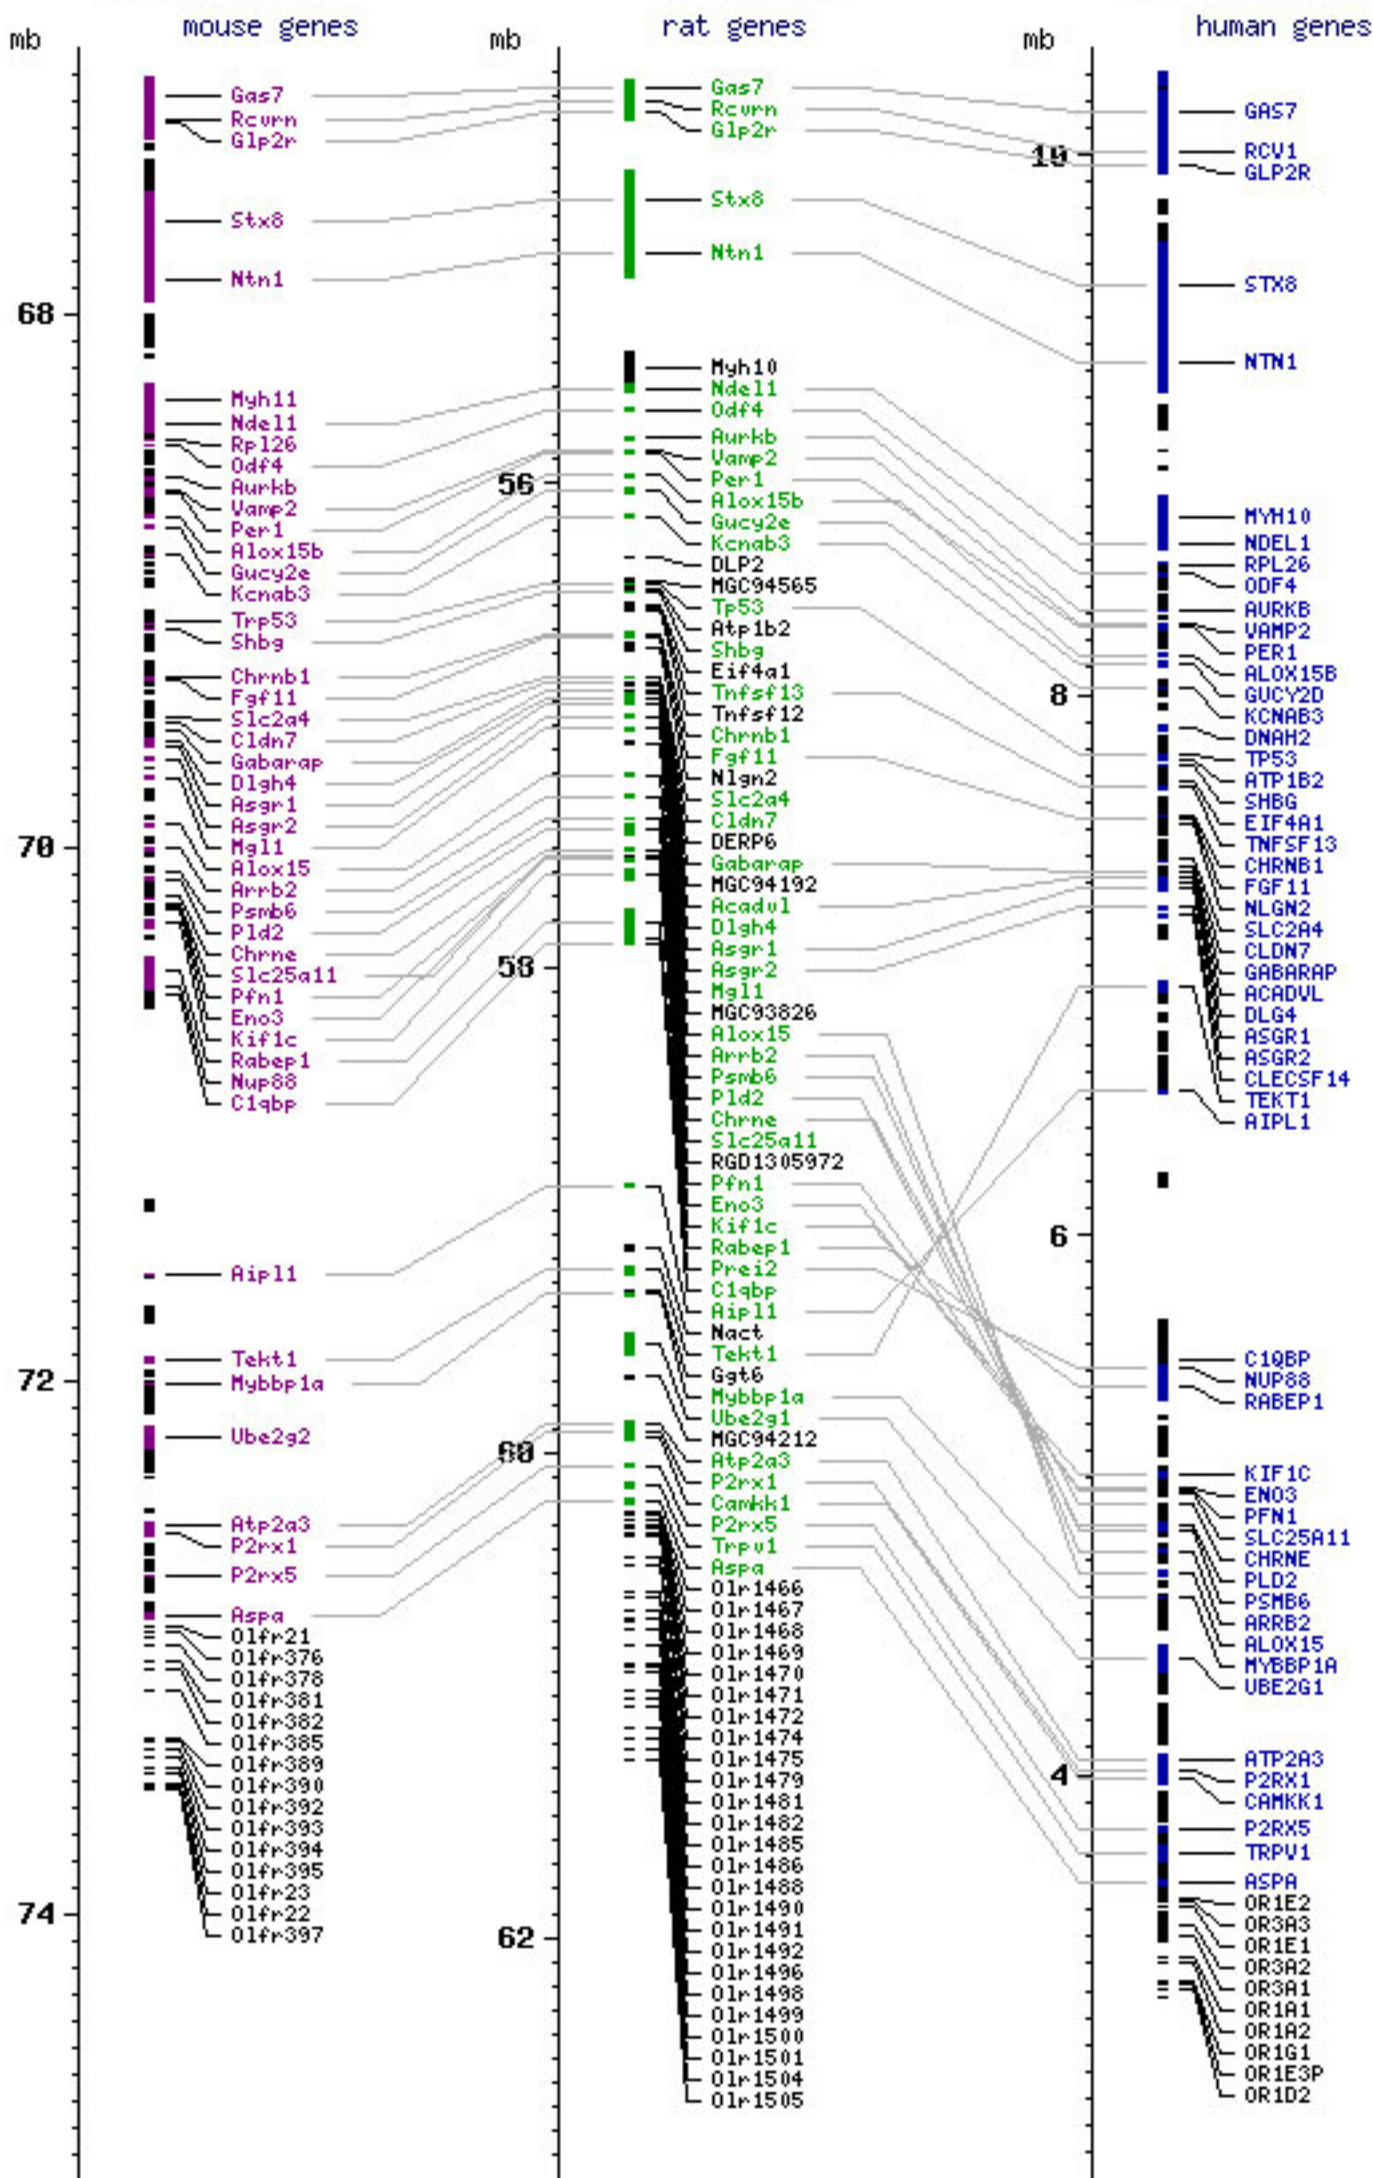

Supplement: pnas_0506643103_2.pdf [file pnas_0506643103_2.pdf]

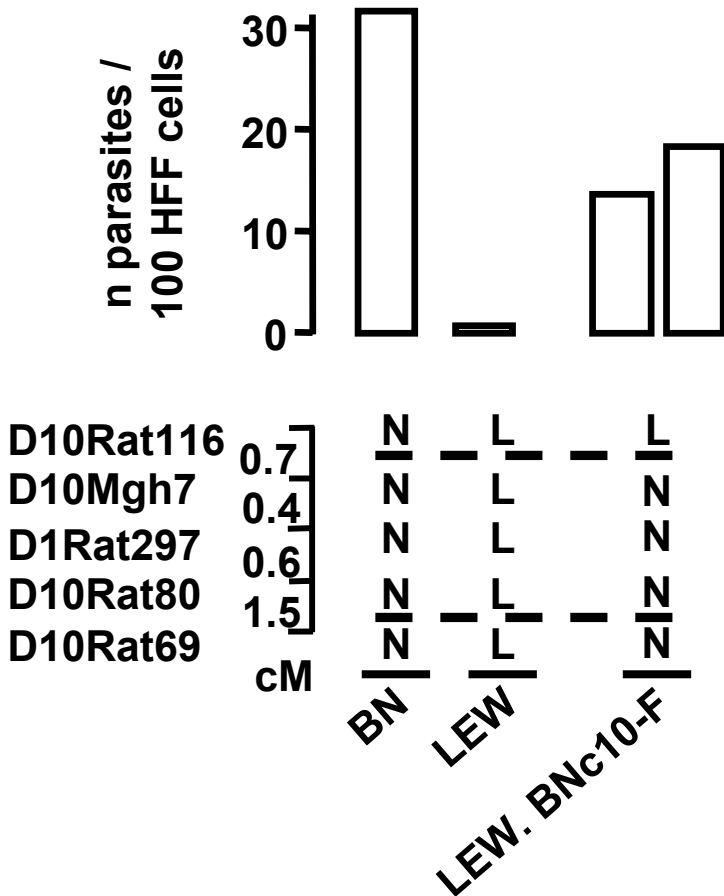

Supplement: pnas_0506643103_3.pdf [file pnas_0506643103_3.pdf]
